# Supplementary material for: 177Lu-DOTA-EB-TATE, a Radiolabeled Analogue of Somatostatin Receptor Type 2, for the Imaging and Treatment of Thyroid Cancer
Source: Oxford University Press journal article supplement (doi:10.1158/1078-0432.ccr-20-3453), 2020-12-22
Supplement: 10780432ccr203453-sup-250662_2_supp_6773834_ql1nnq.docx [file 10780432ccr203453-sup-250662_2_supp_6773834_ql1nnq.docx]

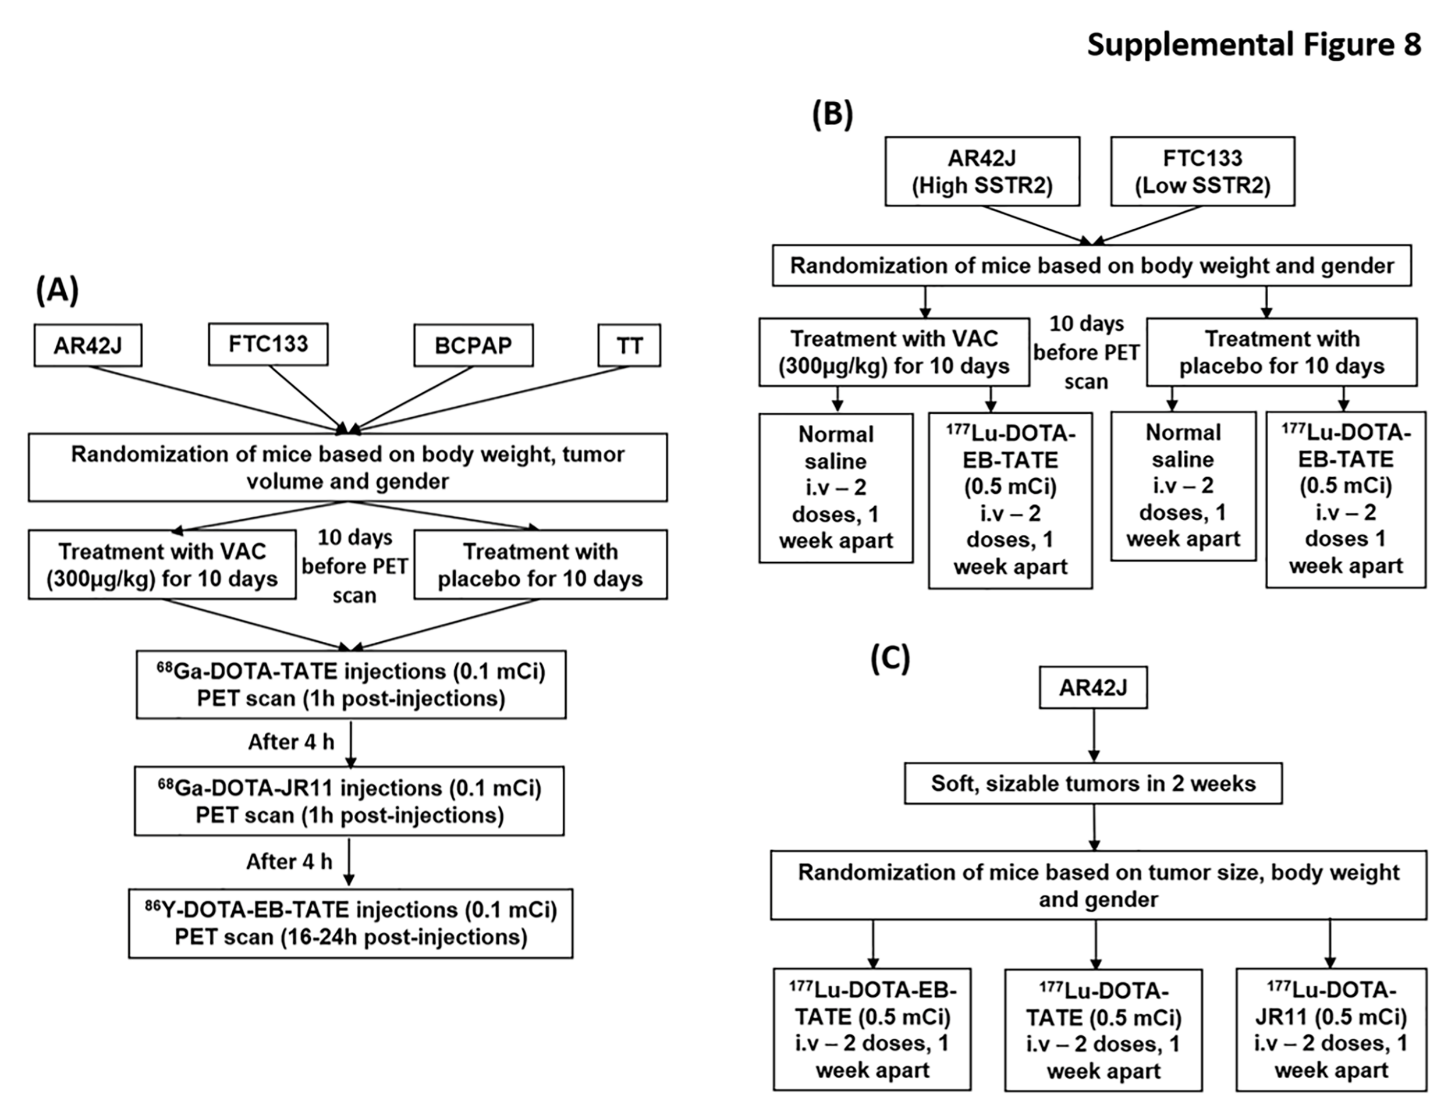


**Supplementary figure 8. Experimental design of mice studies.**

(A) Flow diagram depicts an experimental strategy for PET imaging with different SST analogs in tumor mice models.

(B) Flow diagram depicts an experimental strategy for 177Lu-DOTA-EB-TATE therapy in mice models characterized by high- and low- SSTR2 expression and similar tumor growth rate.

(C) Flow diagram depicts an experimental strategy involving treatment with different 177Lu-labeled SST analogs in a mice model characterized by high- SSTR2 expression.
