# Supplementary material for: 177Lu-DOTA-EB-TATE, a Radiolabeled Analogue of Somatostatin Receptor Type 2, for the Imaging and Treatment of Thyroid Cancer
Source: Oxford University Press journal article supplement (doi:10.1158/1078-0432.ccr-20-3453), 2020-12-22
Supplement: 10780432ccr203453-sup-250662_2_supp_6773836_ql1nnq.docx [file 10780432ccr203453-sup-250662_2_supp_6773836_ql1nnq.docx]

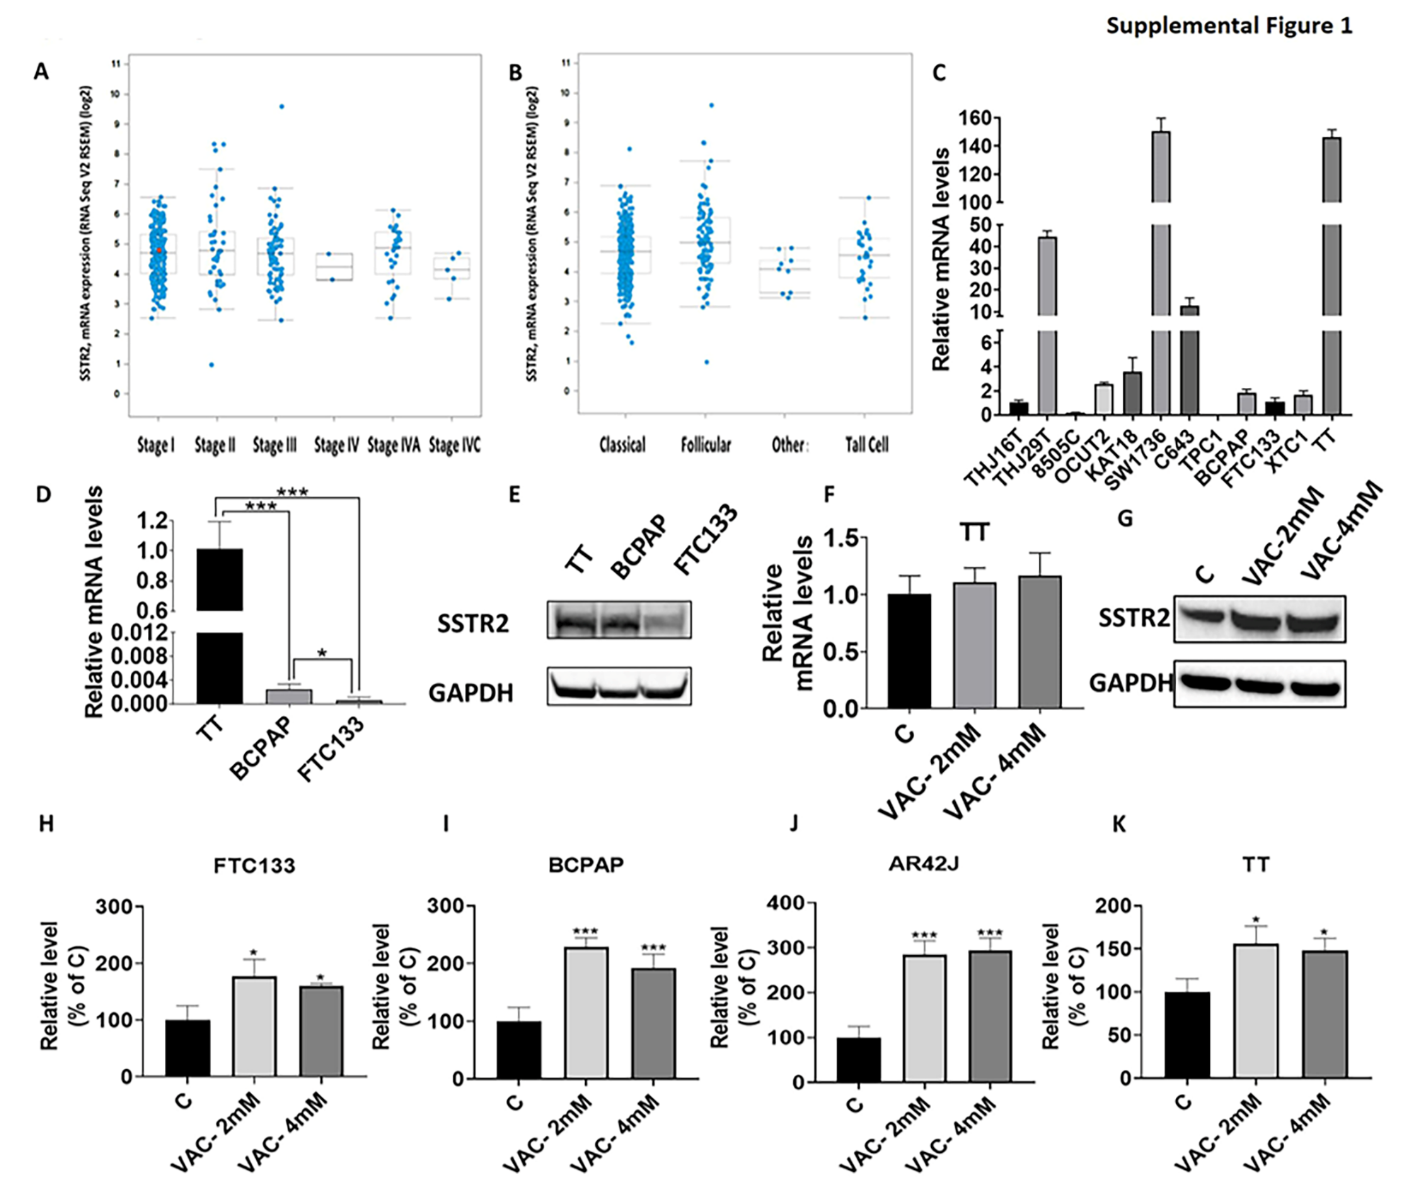


**Supplemental figure 1: SSTR2 is overexpressed in thyroid cancer tissues in comparison to normal thyroid tissues.**

(A) SSTR2 expression in different stages of PTC.

(B) SSTR2 expression in histological subtypes of PTC.

(C) Comparison of SSTR2 mRNA expression in different TC cell lines.

(D) TT cells had significantly higher expression than BCPAP and FTC133 cells at the mRNA level. *p<0.05, ***p<0.001.

(E) TT and BCPAP had similar expression at protein level whereas FTC133 had the lowest expression.

(F) No effect of VAC treatment (2 mM and 4 mM) on the SSTR2 mRNA expression in TT cells (n=4). C-control; VAC-valproic acid.

(G) VAC treatment (2 mM and 4 mM) increased SSTR2 protein expression in TT cells (n=2). C-control; VAC-valproic acid.

(H, I, J, K) Densitometric analysis of SSTR2 expression in control (C) and VAC treated (2 mM and 4 mM) FTC133 (n=3), BCPAP (n=3), AR42J (n=3) and TT (n=2) cells. Data is presented as percent changes in protein expression compared to control and normalized to GAPDH.
