# Supplementary material for: 177Lu-DOTA-EB-TATE, a Radiolabeled Analogue of Somatostatin Receptor Type 2, for the Imaging and Treatment of Thyroid Cancer
Source: Oxford University Press journal article supplement (doi:10.1158/1078-0432.ccr-20-3453), 2020-12-22
Supplement: 10780432ccr203453-sup-250662_2_supp_6773838_ql1nnq.docx [file 10780432ccr203453-sup-250662_2_supp_6773838_ql1nnq.docx]

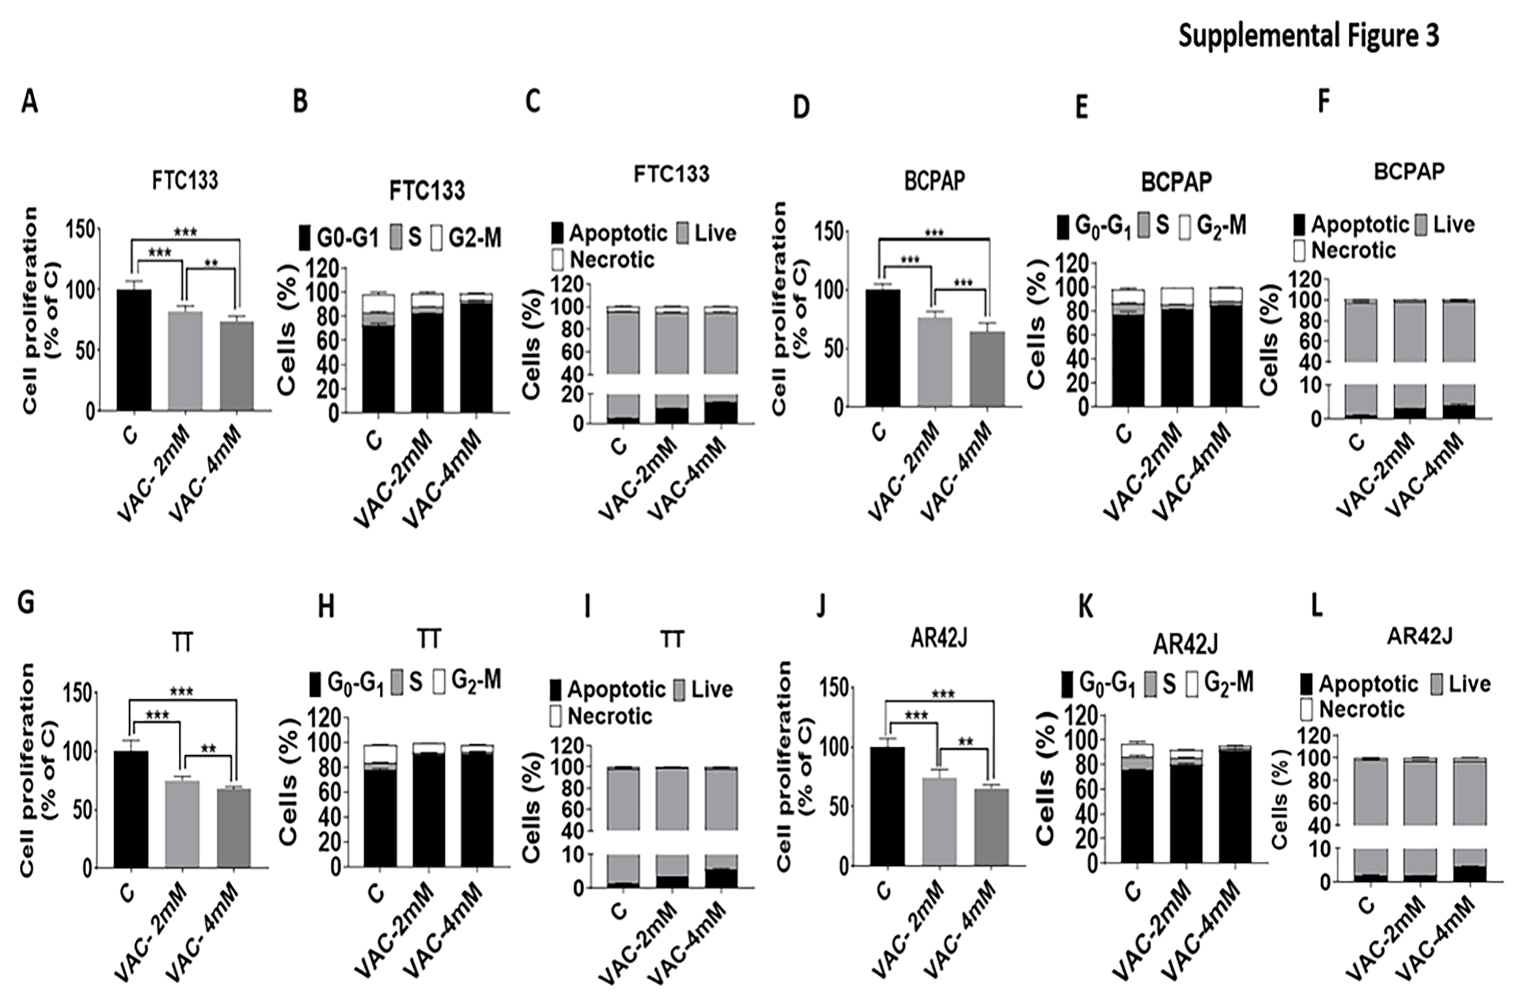


**Supplemental figure 3: VAC inhibits cell proliferation by promoting cell cycle arrest and apoptosis.**

(A, D, G, J) VAC treatment (2 mM and 4 mM) inhibits cellular proliferation of FTC133 (n=3), BCPAP (n=3), TT (n=3) and AR42J (n=3) cells. ***p<0.001; **p<0.01. C-control; VAC-valproic acid.

(B, E, H, K) VAC treatment (2 mM and 4 mM) leads to cell cycle arrest of FTC133 (n=3), BCPAP (n=3), TT (n=3) and AR42J (n=3) cells. C-control; VAC-valproic acid.

(C, F, I, L) VAC treatment (2 mM and 4 mM) promotes apoptosis of FTC133 (n=3), BCPAP (n=3), TT (n=3) and AR42J (n=3) cells, respectively. C-control; VAC-valproic acid.
