# Supplementary material for: 177Lu-DOTA-EB-TATE, a Radiolabeled Analogue of Somatostatin Receptor Type 2, for the Imaging and Treatment of Thyroid Cancer
Source: Oxford University Press journal article supplement (doi:10.1158/1078-0432.ccr-20-3453), 2020-12-22
Supplement: 10780432ccr203453-sup-250662_2_supp_6773839_ql1nnq.docx [file 10780432ccr203453-sup-250662_2_supp_6773839_ql1nnq.docx]

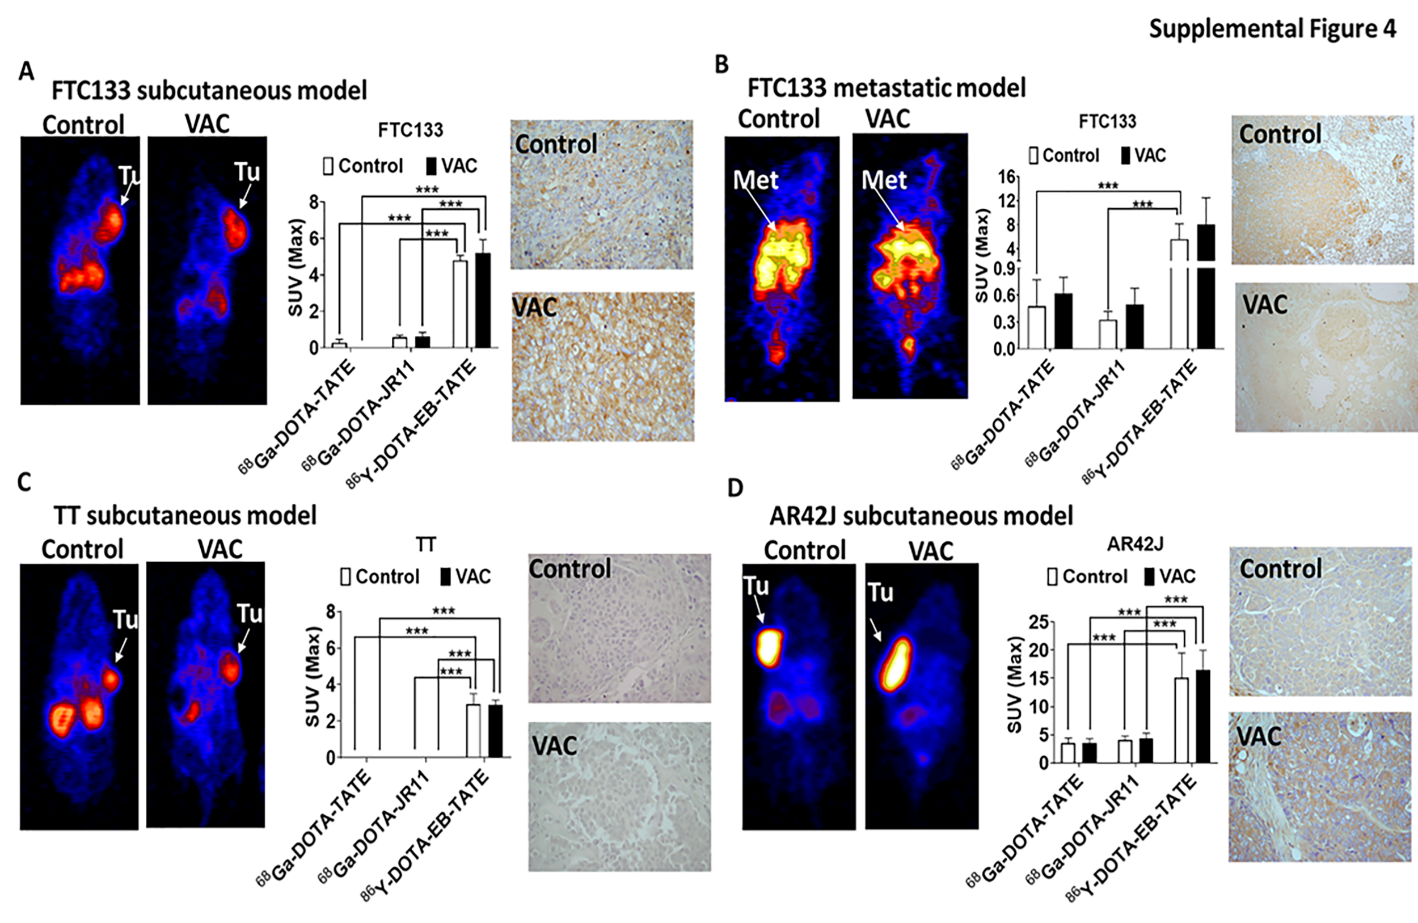


**Supplemental figure 4: VAC treatment did not improve the uptake of SST analogs in the tumors of the mice models.**

(A) Representative PET images comparing the uptake of 86Y-DOTA-EB-TATE between the control and VAC treated FTC133 subcutaneous mice model. The bar graph shows no significant difference in the uptake of 68Ga-DOTA-TATE, 68Ga-DOTA-JR11 and 86Y-DOTA-EB-TATE between the control (n=5) and VAC (n=5) treated mice. The representative immunohistochemistry images show an increased cytoplasmic expression of SSTR2 in the tumors of the VAC treated mice in comparison to the tumors of the control mice (Supplemental Table 2).

(B) Representative PET images comparing the uptake of 86Y-DOTA-EB-TATE between the control and VAC treated FTC133 metastatic mice model. The bar graph shows no significant difference in the uptake of 68Ga-DOTA-TATE, 68Ga-DOTA-JR11 and 86Y-DOTA-EB-TATE between the control (n=8-12) and VAC (n=8-12) treated mice. The immunohistochemistry images show no difference in the expression of SSTR2 in the metastatic tumors of the control and VAC treated FTC133 mice (Supplemental Table 2).

(C) Representative PET images comparing the uptake of 86Y-DOTA-EB-TATE between the control and VAC treated TT subcutaneous mice model. The bar graph shows no significant difference in the uptake of 68Ga-DOTA-TATE, 68Ga-DOTA-JR11 and 86Y-DOTA-EB-TATE between the control (n=5) and VAC (n=5) treated mice. The representative immunohistochemistry images show no difference in the expression of SSTR2 within the tumors of the control and VAC treated mice (Supplemental Table 2).

(D) Representative PET images comparing the uptake of 86Y-DOTA-EB-TATE between the control and VAC treated AR42J subcutaneous mice model. The bar graph shows no significant difference in the uptake of 68Ga-DOTA-TATE, 68Ga-DOTA-JR11 and 86Y-DOTA-EB-TATE between the control (n=4) and VAC (n=5) treated mice. The representative immunohistochemistry images show an increased expression of SSTR2 in the tumors of the VAC treated mice in comparison to the tumors of the control mice (Supplemental Table 2).

Tumors (Tu) and metastasis (Met) are indicated by white arrows. The SUV scales range from 0 to 3 for 68Ga-DOTA-TATE and 68Ga-DOTA-JR11 and 0 to 15 for 86Y-DOTA-EB-TATE. Data are presented as mean±SD.
