# Supplementary material for: 177Lu-DOTA-EB-TATE, a Radiolabeled Analogue of Somatostatin Receptor Type 2, for the Imaging and Treatment of Thyroid Cancer
Source: Oxford University Press journal article supplement (doi:10.1158/1078-0432.ccr-20-3453), 2020-12-22
Supplement: 10780432ccr203453-sup-250662_2_supp_6773854_ql1nnq.docx [file 10780432ccr203453-sup-250662_2_supp_6773854_ql1nnq.docx]

**Supplemental Table 2.** **Analysis of the metastatic lesions characterized by the highest 68Ga-DOTATATE maximum standard uptake values (SUVmax) in 25 patients enrolled in the clinical trial.** The data on patients with SUVmax in metastatic lesions exceeding 15 are bolded. PTC – papillary thyroid cancer, PTCTC – tall cell variant PTC, HTC – Hurthle cell thyroid cancer, MTC – medullary thyroid cancer. * uptake similar to background uptake

| ID | Age at TC diagnosis | Sex | Histology | Location of the tumor with the highest  SUVmax | Highest SUV max | Liver SUV max | Tumor SUVmax/liver SUVmax ratio |
| --- | --- | --- | --- | --- | --- | --- | --- |
| 1 | 24 | M | PTCTC | Neck lymph node | 4.6 | 13.7 | 0.3 |
| 2 | 32 | F | PTC | Lungs | 1.4* | 8.8 | 0.2 |
| 3 | 44 | F | PTC | Lungs | 10 | 12.6 | 0.8 |
| **4** | **47** | **M** | **PTC** | **Mediastinum** | **27.2** | **14.2** | **1.9** |
| 5 | 61 | M | PTC | Lungs | 8.5 | 14.5 | 0.6 |
| 6 | 57 | M | PTCTC | Neck lymph node | 7 | 14 | 0.5 |
| 7 | 64 | M | PTC | Rib | 4.3 | 11 | 0.39 |
| 8 | 63 | F | PTCTC | Lungs | 0 | 13.8 | 0 |
| 9 | 32 | F | PTC | Lungs | 0 | 10.9 | 0 |
| 10 | 30 | F | PTC | Neck lymph node | 4.2 | 12 | 0.3 |
| 11 | 20 | F | PTC | Neck lymph node | 6.8 | 12.6 | 0.5 |
| 12 | 23 | F | PTC | Mediastinum | 3.2 | 9.7 | 0.3 |
| **13** | **50** | **M** | **HTC** | **Bones** | **33** | **9.1** | **3.6** |
| **14** | **61** | **M** | **HTC** | **Iliac bone** | **18.4** | **13.8** | **1.3** |
| **15** | **52** | **M** | **HTC** | **Sternum** | **49.2** | **16** | **3.1** |
| 16 | 55 | M | HTC | Rib | 4.8 | 15.2 | 0.3 |
| **17** | **71** | **M** | **HTC** | **Liver** | **30.6** | **14.5** | **2.1** |
| 18 | 38 | F | MTC | Neck lymph node | 7 | 8.3 | 0.8 |
| 19 | 31 | M | MTC | Neck lymph node | 3.7* | 10.1 | 0.4 |
| 20 | 18 | F | MTC | Bone Th7 | 3.8 | 7.3 | 0.5 |
| **21** | **34** | **F** | **MTC** | **Left Femur** | **22.6** | **12.2** | **1.9** |
| 22 | 22 | F | MTC | Lungs | 0 | 10.5 | 0 |
| 23 | 25 | F | MTC | Neck lymph node | 4.6 | 7.2 | 0.6 |
| 24 | 23 | M | MTC | Rib | 12.8 | 15.1 | 0.8 |
| **25** | **23** | **F** | **MTC** | **Thyroid** | **35.5** | **9.6** | **3.7** |
