# Supplementary material for: 177Lu-DOTA-EB-TATE, a Radiolabeled Analogue of Somatostatin Receptor Type 2, for the Imaging and Treatment of Thyroid Cancer
Source: Oxford University Press journal article supplement (doi:10.1158/1078-0432.ccr-20-3453), 2020-12-22
Supplement: 10780432ccr203453-sup-250662_2_supp_6773855_ql1nnq.docx [file 10780432ccr203453-sup-250662_2_supp_6773855_ql1nnq.docx]

**Supplemental Table 3: Analysis of immunostaining of SSTR2 in tumor-derived from mice xenografts.** Score 0–no staining, Score 1–positive staining in <25% of cells, Score 2–positive staining in 25-50% of cells, Score 3–positive staining in >50% of cells.

|  | **Score 0** | **Score 1** | **Score 2** | **Score 3** | **P value** |
| --- | --- | --- | --- | --- | --- |
| **FTC133 Control (N=11)** | 0 | 3 | 7 | 1 | *0.023 |
| **FTC133 VAC (N=13)** | 0 | 0 | 8 | 5 |
| **TT Control (N=5)** | 3 | 2 | 0 | 0 | 0.58 |
| **TT VAC (N=5)** | 2 | 3 | 0 | 0 |
| **AR42J Control (N=10)** | 0 | 4 | 5 | 1 | *0.016 |
| **AR42J VAC (N=13)** | 0 | 0 | 8 | 5 |
